# Supplementary material for: Pentatricopeptide repeat protein DEK40 is required for mitochondrial function and kernel development in maize
Source: PubMed Central journal article supplement — J Exp Bot. 2019 Sep 6;70(21):6163–79. doi: 10.1093/jxb/erz391 (PMC6859738; doi:10.1093/jxb/erz391), 2019-09-06
Supplement: erz391_suppl_supplementary_figures.pdf [file erz391_suppl_supplementary_figures.pdf]

Article title: **Pentatricopeptide repeat protein DEK40 is required for mitochondrial function and kernel development in maize**

Authors: Ru Chang Ren<sup>1</sup>, Xiaoduo Lu<sup>2</sup>, Ya Jie Zhao<sup>1</sup>, Yi Ming Wei<sup>1</sup>, Li Li Wang<sup>1</sup>, Lin Zhang<sup>1</sup>, Wen Ting Zhang<sup>1</sup>, Chunyi Zhang<sup>3</sup>, Xian Sheng Zhang<sup>1\*</sup>, Xiang Yu Zhao<sup>1\*</sup>

**Supplementary Fig. S1-S5**

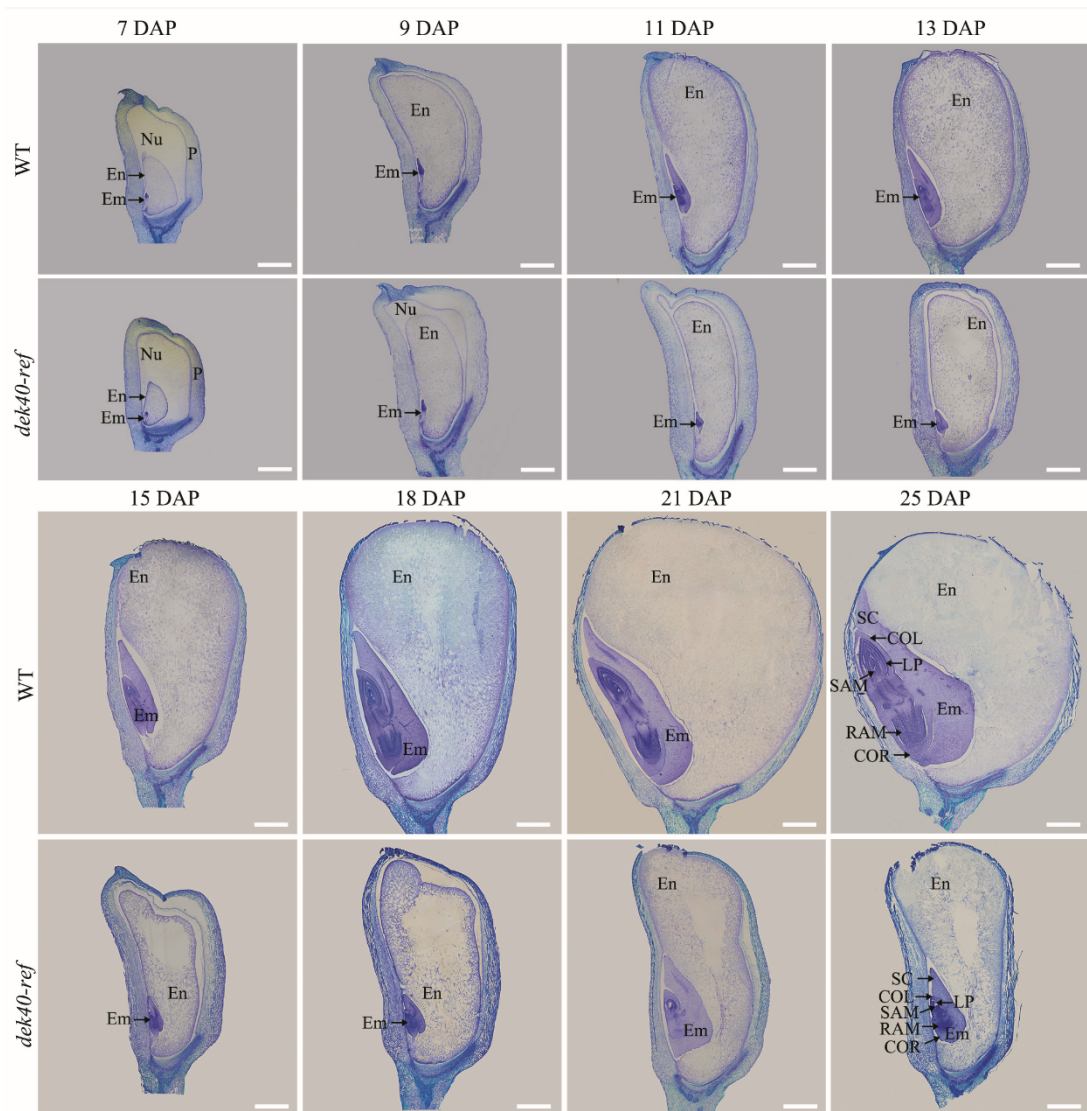

**Fig. S1 Paraffin sections analysis of WT and *dek40-ref* kernels at different developmental stages**

En, endosperm; Em, embryo; Nu, nucellus; P, pericarp; LP, leaf primordia; RAM, root apical meristem; SAM, shoot apical meristem; SC, scutellum; COL, coleoptile; COR, coleorhiza. Scale bars, 1 mm.

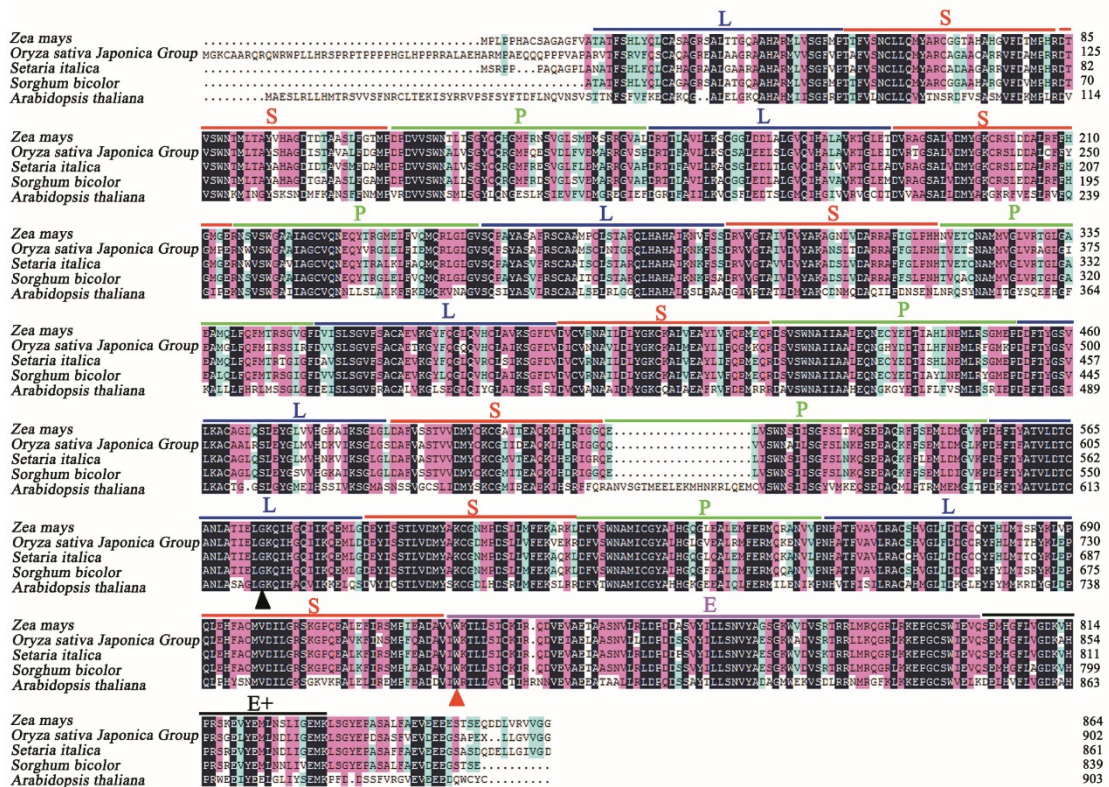

**Fig. S2 Amino acids alignment of maize DEK40 with homologous PPR proteins in other plant species**

PPR elements are indicated. S type is indicated by red line; L type is indicated by blue line; P type is indicated by green line; E domain is indicated by purple line; E+ domain is indicated by black line. The mutant sites in *dek40-ref* and *dek40-1* are indicated by black arrowhead and red arrowhead, respectively.

*Arabidopsis thaliana*, sequence ID NP\_186882.2; *Setaria italica*, sequence ID XP\_012698197.1; *Oryza sativa Japonica Group*, sequence ID XP\_015612764.1; *Sorghum bicolor*, sequence ID XP\_002441797.1; *Zea mays*, sequence ID XP\_008662428.1. All data obtained from the NCBI (<https://www.ncbi.nlm.nih.gov/>).

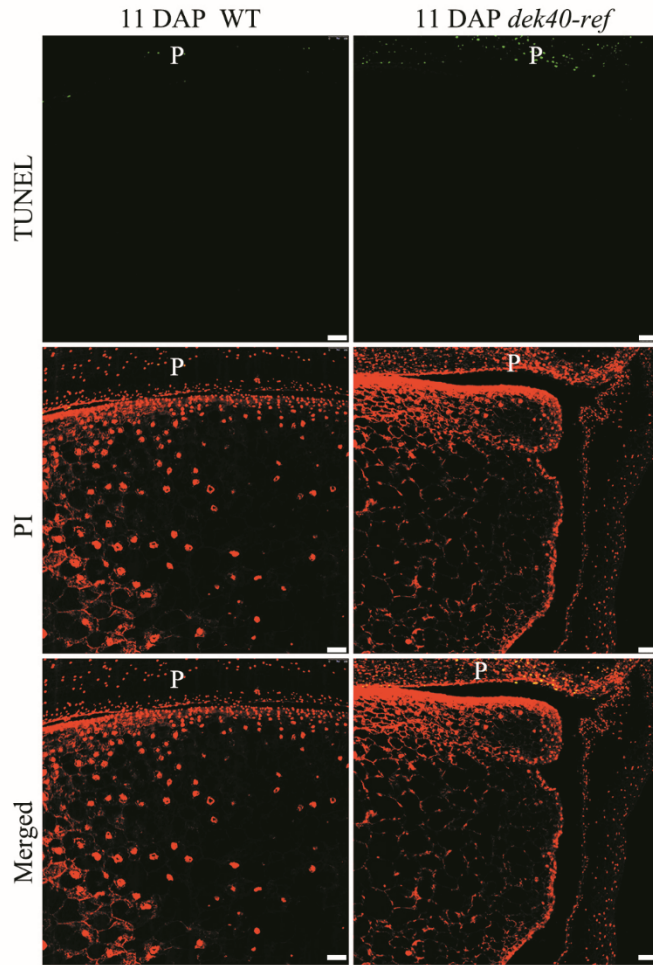

**Fig. S3 Nuclear DNA fragmentation was detected in WT and *dek40-ref* endosperm at 11 DAP by TUNEL assay**

The green is the TUNEL signals. The red is PI indicated nuclei. The yellow is merged of TUNEL detected nuclei and PI detected nuclei. P, pericarp. Scale bars, 100  $\mu$ m.

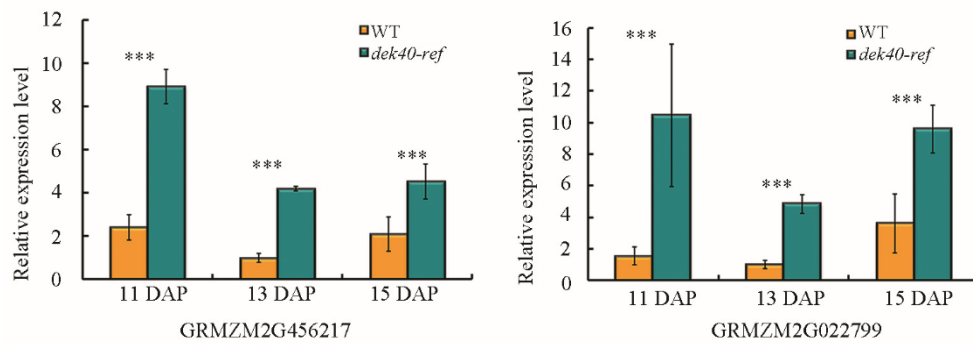

**Fig. S4 The expression levels of PCD associated genes**

The expression levels of PCD associated genes (Cysteine proteinase gene, GRMZM2G456217; Metacaspase gene, GRMZM2G022799) in WT and *dek40-ref* at 11, 13 and 15 DAP. Values and bars represent the mean and standard deviation of three biological replicates, respectively. The RNA levels were normalized to that of maize *ZmActin* gene (GRMZM2G126010). Significant differences are indicated.  $**P < 0.01$ ,  $***P < 0.001$  (Student's t-test).

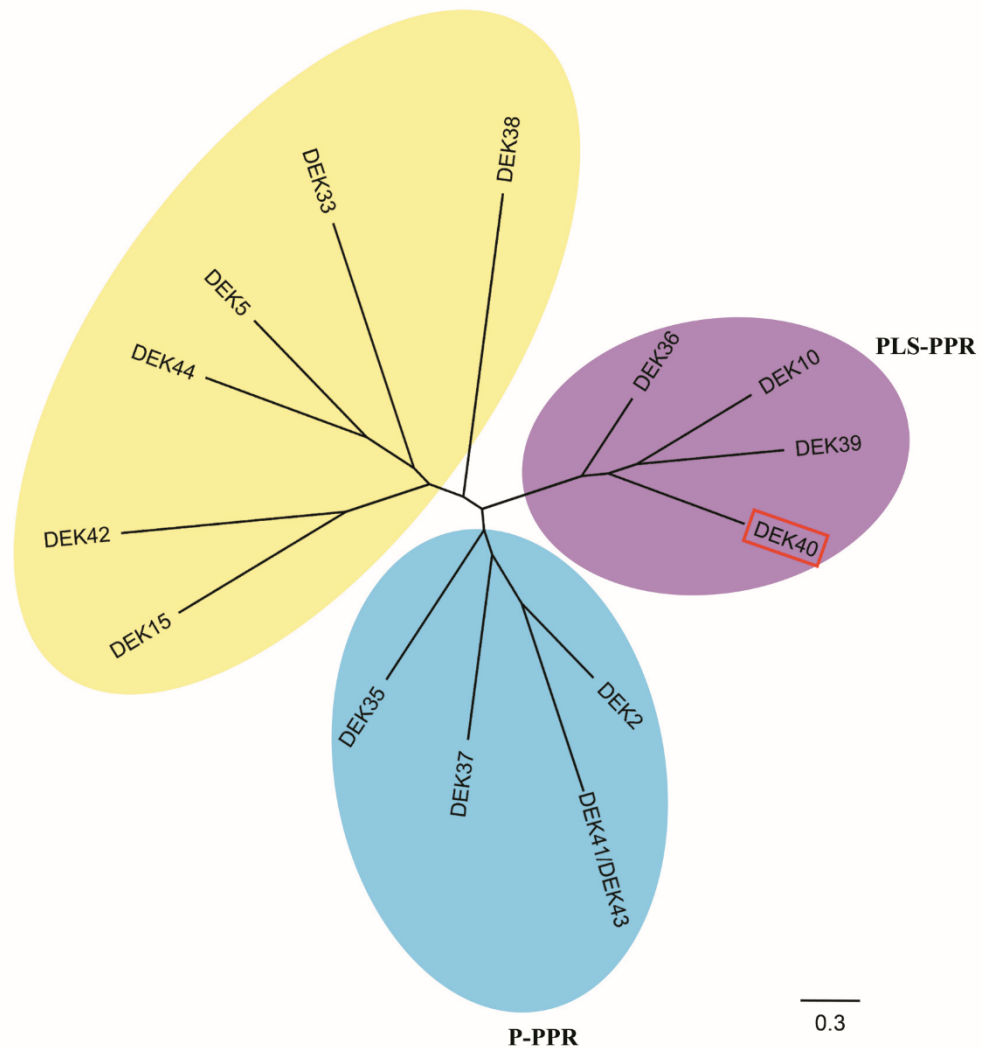

**Fig. S5 Phylogenetic relationships between the DEK40 and other maize DEK proteins.**

Several *Dek* genes involved in maize kernel development had been reported in previous studies. *Dek2* encodes a P-type PPR protein (Qi *et al.*, 2017b). *Dek5* encodes a protein homologous to rice SUBSTANDARD STARCH GRAIN4 (SSG4) and *E.coli* tamB (Zhang *et al.*, 2019). *Dek10* encodes an E subgroup PPR protein (Qi *et al.*, 2017a). *Dek15* encodes a homolog of SISTER CHROMATID COHESION PROTEIN 4 (SCC4) (He *et al.*, 2019). *Dek33* encodes the pyrimidine reductase in riboflavin biosynthesis (Dai *et al.*, 2019). *Dek35* encodes a P-type PPR protein (Chen *et al.*, 2017). *Dek36* encodes an E+ subgroup PPR protein (Wang *et al.*, 2017). *Dek37* encodes a P-type PPR Protein (Dai *et al.*, 2018). *Dek38* encodes a TTI2

(Tel2-interacting protein 2) molecular cochaperone (Garcia *et al.*, 2017). *Dek39* encodes an E subclass PPR protein (Li *et al.*, 2018). *Dek41/Dek43* encodes a P-type PPR protein (Zhu *et al.*, 2019). *Dek42* encodes an RRM\_RBM48 type RNA-binding protein (Zuo *et al.*, 2019). *Dek44* encodes a putative 50S ribosomal protein L9 (Qi *et al.*, 2019). The purple part is PLS-type PPR proteins (PLS-PPR), the light blue part is P-type PPR proteins (P-PPR), the yellow part is other types proteins. DEK40 is indicated in red box. Bar, 0.3.

## References

- Chen X, Feng F, Qi W, Xu L, Yao D, Wang Q, Song R.** 2017. *Dek35* encodes a PPR protein that affects *cis*-splicing of mitochondrial *nad4* intron 1 and seed development in maize. *Molecular Plant* **10**, 427-441.
- Dai D, Luan S, Chen X, Wang Q, Feng Y, Zhu C, Qi W, Song R.** 2018. Maize *Dek37* encodes a P-type PPR protein that affects *cis*-splicing of mitochondrial *nad2* intron 1 and seed development. *Genetics* **208**, 1069-1082.
- Dai D, Tong H, Cheng L, Peng F, Zhang T, Qi W, Song R.** 2019. Maize *Dek33* encodes a pyrimidine reductase in riboflavin biosynthesis essential for oilbody formation and ABA biosynthesis during seed development. *Journal of Experimental Botany* doi: 10.1093/jxb/erz268
- Garcia N, Li Y, Dooner HK, Messing J.** 2017. Maize *defective kernel* mutant generated by insertion of a *Ds* element in a gene encoding a highly conserved TTI2 cochaperone. *Proceedings of the National Academy of Sciences of the United States of America* **114**, 5165-5170.
- He Y, Wang J, Qi W, Song R.** 2019. Maize *Dek15* encodes the cohesin-loading complex subunit SCC4 and is essential for chromosome segregation and kernel development. *The Plant Cell* **31**, 465–485.
- Li X, Gu W, Sun S, Chen Z, Chen J, Song W, Zhao H, Lai J.** 2018. *Defective Kernel 39* encodes a PPR protein required for seed development in maize. *Journal of Integrative Plant Biology* **60**, 45-64.
- Qi W, Lu L, Huang S, Song R.** 2019. Maize *Dek44* encodes mitochondrial ribosomal

protein L9 and is required for seed development. *Plant Physiology* doi: 10.1104/pp.19.00546

**Qi W, Tian Z, Lu L, Chen X, Chen X, Zhang W, Song R.** 2017a. Editing of mitochondrial transcripts *nad3* and *cox2* by Dek10 is essential for mitochondrial function and maize plant development. *Genetics* **205**, 1489-1501.

**Qi W, Yang Y, Feng X, Zhang M, Song R.** 2017b. Mitochondrial function and maize kernel development requires Dek2, a pentatricopeptide repeat protein involved in *nad1* mRNA splicing. *Genetics* **205**, 239-249.

**Ren RC, Wang LL, Zhang L, Zhao YJ, Wu JW, Wei YM, Zhang XS, Zhao XY.** 2019. DEK43 is a P-type PPR protein responsible for the *cis*-splicing of *nad4* in maize mitochondria. *Journal of Integrative Plant Biology* doi: 10.1111/jipb.12843

**Wang G, Zhong M, Shuai B, Song J, Zhang J, Han L, Ling H, Tang Y, Wang G, Song R.** 2017. E+ subgroup PPR protein *defective kernel 36* is required for multiple mitochondrial transcripts editing and seed development in maize and Arabidopsis. *New Phytologist* **214**, 1563-1578.

**Zhang J, Wu S, Boehlein SK, McCarty DR, Song G, Walley JW.** 2019. *Maize defective kernel5* is a bacterial TamB homologue required for chloroplast envelope biogenesis. *Journal of Cell Biology* doi: 10.1083/jcb.201807166

**Zhu C, Jin G, Fang P, Zhang Y, Feng X, Tang Y, Qi W, Song R.** 2019. Maize pentatricopeptide repeat protein DEK41 affects *cis*-splicing of mitochondrial *nad4* intron 3 and seed development. *Journal of Experimental Botany* doi: 10.1093/jxb/erz193

**Zuo Y, Feng F, Qi W, Song R.** 2019. *Dek42* encodes an RNA binding protein that affects alternative pre-mRNA splicing and maize kernel development. *Journal of Integrative Plant Biology* **61**, 728-748.
