# Supplementary material for: Pentatricopeptide repeat protein DEK40 is required for mitochondrial function and kernel development in maize
Source: PubMed Central journal article supplement — J Exp Bot. 2019 Sep 6;70(21):6163–79. doi: 10.1093/jxb/erz391 (PMC6859738; doi:10.1093/jxb/erz391), 2019-09-06
Supplement: erz391_suppl_supplementary_table.pdf [file erz391_suppl_supplementary_table.pdf]

### Supplementary Table S1-S4

Article title: **Pentatricopeptide repeat protein DEK40 is required for mitochondrial function and kernel development in maize**

Authors: Ru Chang Ren<sup>1</sup>, Xiaoduo Lu<sup>2</sup>, Ya Jie Zhao<sup>1</sup>, Yi Ming Wei<sup>1</sup>, Li Li Wang<sup>1</sup>, Lin Zhang<sup>1</sup>, Wen Ting Zhang<sup>1</sup>, Chunyi Zhang<sup>3</sup>, Xian Sheng Zhang<sup>1\*</sup>, Xiang Yu Zhao<sup>1\*</sup>

**Table S1 Genetic analysis of the kernels in F<sub>2</sub> population of the segregating ears**

| F <sub>2</sub> population        | Number<br>of<br>mutants | Number of WT | Actual<br>ratio | Expected<br>ratio | <i>P</i> |
|----------------------------------|-------------------------|--------------|-----------------|-------------------|----------|
| S162 × <i>dek40-ref/+</i>        | 724                     | 2134         | 1:2.95          | 1:3               | 0.68     |
| V3b1 × <i>dek40-ref/+</i>        | 446                     | 1328         | 1:2.98          | 1:3               | 0.89     |
| Mo17 × <i>dek40-ref/+</i>        | 368                     | 1130         | 1:3.07          | 1:3               | 0.70     |
| Chang7-2 ×<br><i>dek40-ref/+</i> | 803                     | 2554         | 1:3.18          | 1:3               | 0.15     |

**Table S2 Co-segregation analysis of the mutant sites and phenotypes of progenies from wild-type phenotype kernels segregated from self-pollinated *dek40-ref* heterozygous ears**

| No. of individuals | GRMZM2G304965 mutant site (+1719) | GRMZM2G005207 mutant site (+262) | Phenotype of the self-pollinated ear |
|--------------------|-----------------------------------|----------------------------------|--------------------------------------|
| 16-1               | G/G                               | G/G                              | No-Segregation                       |
| 16-2               | G/A                               | G/A                              | Segregation                          |
| 16-3               | G/A                               | G/A                              | Segregation                          |
| 16-4               | G/G                               | G/G                              | No-Segregation                       |
| 16-5               | G/G                               | G/G                              | No-Segregation                       |
| 16-6               | G/G                               | G/G                              | No-Segregation                       |
| 16-7               | G/G                               | G/G                              | No-Segregation                       |
| 16-8               | G/G                               | G/G                              | No-Segregation                       |
| 16-9               | G/A                               | G/A                              | Segregation                          |
| 16-10              | G/A                               | G/A                              | Segregation                          |
| 16-11              | G/A                               | G/A                              | Segregation                          |
| 16-12              | G/A                               | G/A                              | Segregation                          |
| 16-13              | G/G                               | G/G                              | No-Segregation                       |
| 16-14              | G/A                               | G/A                              | Segregation                          |
| 16-15              | G/A                               | G/A                              | Segregation                          |
| 16-16              | G/A                               | G/A                              | Segregation                          |
| 16-17              | G/A                               | G/A                              | Segregation                          |
| 16-18              | G/A                               | G/A                              | Segregation                          |
| 16-19              | G/G                               | G/G                              | No-Segregation                       |
| 16-20              | G/A                               | G/A                              | Segregation                          |
| 16-21              | G/A                               | G/A                              | Segregation                          |
| 16-22              | G/A                               | G/A                              | Segregation                          |
| 16-23              | G/A                               | G/A                              | Segregation                          |
| 16-24              | G/A                               | G/A                              | Segregation                          |
| 16-25              | G/G                               | G/A                              | No-Segregation                       |
| 16-26              | G/A                               | G/A                              | Segregation                          |
| 16-27              | G/A                               | G/A                              | Segregation                          |
| 16-28              | G/A                               | G/A                              | Segregation                          |
| 16-29              | G/A                               | G/G                              | Segregation                          |
| 16-30              | G/A                               | G/A                              | Segregation                          |
| 16-31              | G/G                               | G/G                              | No-Segregation                       |
| 16-32              | G/A                               | G/A                              | Segregation                          |
| 16-33              | G/A                               | G/A                              | Segregation                          |
| 16-34              | G/A                               | G/A                              | Segregation                          |
| 16-35              | G/A                               | G/A                              | Segregation                          |
| 16-36              | G/A                               | G/A                              | Segregation                          |
| 16-37              | G/G                               | G/G                              | No-Segregation                       |
| 16-38              | G/G                               | G/G                              | No-Segregation                       |

---

|       |     |     |                |
|-------|-----|-----|----------------|
| 16-39 | G/A | G/A | Segregation    |
| 16-40 | G/A | G/A | Segregation    |
| 16-41 | G/A | G/A | Segregation    |
| 16-42 | G/A | G/A | Segregation    |
| 16-43 | G/A | G/A | Segregation    |
| 16-44 | G/A | G/A | Segregation    |
| 16-45 | G/A | G/A | Segregation    |
| 16-46 | G/A | G/A | Segregation    |
| 16-47 | G/A | G/A | Segregation    |
| 16-48 | G/G | G/G | No-Segregation |
| 16-49 | G/G | G/G | No-Segregation |
| 16-50 | G/A | G/A | Segregation    |
| 16-51 | G/A | G/A | Segregation    |
| 16-52 | G/A | G/A | Segregation    |
| 16-53 | G/A | G/A | Segregation    |
| 16-54 | G/G | G/G | No-Segregation |
| 16-55 | G/A | G/A | Segregation    |
| 16-56 | G/A | G/A | Segregation    |
| 16-57 | G/A | G/A | Segregation    |
| 16-58 | G/G | G/G | No-Segregation |
| 16-59 | G/A | G/A | Segregation    |
| 16-60 | G/A | G/A | Segregation    |
| 16-61 | G/G | G/G | No-Segregation |
| 16-62 | G/A | G/A | Segregation    |
| 16-63 | G/G | G/G | No-Segregation |
| 16-64 | G/G | G/G | No-Segregation |
| 16-65 | G/A | G/A | Segregation    |
| 16-66 | G/G | G/G | No-Segregation |
| 16-67 | G/A | G/A | Segregation    |
| 16-68 | G/G | G/G | No-Segregation |
| 16-69 | G/A | G/A | Segregation    |
| 16-70 | G/A | G/A | Segregation    |
| 16-71 | G/A | G/A | Segregation    |
| 16-72 | G/A | G/A | Segregation    |
| 16-73 | G/G | G/G | No-Segregation |
| 16-74 | G/A | G/A | Segregation    |
| 16-75 | G/A | G/A | Segregation    |
| 16-76 | G/G | G/G | No-Segregation |
| 16-77 | G/G | G/G | No-Segregation |
| 16-78 | G/G | G/G | No-Segregation |
| 16-79 | G/G | G/G | No-Segregation |
| 16-80 | G/A | G/A | Segregation    |
| 16-81 | G/G | G/G | No-Segregation |
| 16-82 | G/G | G/G | No-Segregation |

---

---

|        |     |     |                |
|--------|-----|-----|----------------|
| 16-83  | G/A | G/A | Segregation    |
| 16-84  | G/A | G/A | Segregation    |
| 16-85  | G/G | G/G | No-Segregation |
| 16-86  | G/A | G/A | Segregation    |
| 16-87  | G/A | G/A | Segregation    |
| 16-88  | G/G | G/G | No-Segregation |
| 16-89  | G/G | G/G | No-Segregation |
| 16-90  | G/A | G/A | Segregation    |
| 16-91  | G/A | G/A | Segregation    |
| 16-92  | G/A | G/A | Segregation    |
| 16-93  | G/A | G/A | Segregation    |
| 16-94  | G/G | G/G | No-Segregation |
| 16-95  | G/G | G/G | No-Segregation |
| 16-96  | G/A | G/A | Segregation    |
| 16-97  | G/A | G/A | Segregation    |
| 16-98  | G/G | G/G | No-Segregation |
| 16-99  | G/A | G/A | Segregation    |
| 16-100 | G/G | G/G | No-Segregation |
| 16-101 | G/A | G/A | Segregation    |
| 16-102 | G/G | G/G | No-Segregation |
| 16-103 | G/A | G/A | Segregation    |
| 16-104 | G/A | G/A | Segregation    |
| 16-105 | G/A | G/A | Segregation    |
| 16-106 | G/G | G/G | No-Segregation |
| 16-107 | G/G | G/G | No-Segregation |
| 16-108 | G/A | G/A | Segregation    |
| 16-109 | G/A | G/A | Segregation    |
| 16-110 | G/A | G/A | Segregation    |
| 16-111 | G/A | G/A | Segregation    |
| 16-112 | G/A | G/A | Segregation    |
| 16-113 | G/G | G/G | No-Segregation |
| 16-114 | G/G | G/G | No-Segregation |
| 16-115 | G/A | G/A | Segregation    |
| 16-116 | G/A | G/A | Segregation    |
| 16-117 | G/A | G/A | Segregation    |
| 16-118 | G/A | G/A | Segregation    |
| 16-119 | G/A | G/A | Segregation    |
| 16-120 | G/A | G/A | Segregation    |
| 16-121 | G/A | G/A | Segregation    |
| 16-122 | G/A | G/A | Segregation    |
| 16-123 | G/A | G/A | Segregation    |
| 16-124 | G/G | G/G | No-Segregation |
| 16-125 | G/A | G/A | Segregation    |
| 16-126 | G/G | G/G | No-Segregation |

---

|        |     |     |                |
|--------|-----|-----|----------------|
| 16-127 | G/A | G/A | Segregation    |
| 16-128 | G/G | G/G | No-Segregation |
| 16-129 | G/A | G/A | Segregation    |
| 16-130 | G/G | G/G | No-Segregation |
| 16-131 | G/A | G/A | Segregation    |
| 16-132 | G/G | G/G | No-Segregation |
| 16-133 | G/A | G/A | Segregation    |
| 16-134 | G/G | G/G | No-Segregation |
| 16-135 | G/G | G/G | No-Segregation |
| 16-136 | G/A | G/A | Segregation    |
| 16-137 | G/G | G/G | No-Segregation |
| 16-138 | G/G | G/G | No-Segregation |
| 16-139 | G/G | G/G | No-Segregation |
| 16-140 | G/G | G/G | No-Segregation |
| 16-141 | G/A | G/A | Segregation    |
| 16-142 | G/G | G/G | No-Segregation |
| 16-143 | G/A | G/A | Segregation    |
| 16-144 | G/A | G/A | Segregation    |
| 16-145 | G/A | G/A | Segregation    |
| 16-146 | G/G | G/G | No-Segregation |
| 16-147 | G/A | G/A | Segregation    |
| 16-148 | G/A | G/A | Segregation    |
| 16-149 | G/G | G/G | No-Segregation |
| 16-150 | G/G | G/G | No-Segregation |
| 16-151 | G/G | G/G | No-Segregation |
| 16-152 | G/A | G/A | Segregation    |
| 16-153 | G/G | G/G | No-Segregation |
| 16-154 | G/A | G/A | Segregation    |
| 16-155 | G/G | G/G | No-Segregation |
| 16-156 | G/G | G/G | No-Segregation |
| 16-157 | G/G | G/G | No-Segregation |
| 16-158 | G/A | G/A | Segregation    |

Note: One hundred fifty eight WT phenotype individuals that were segregated from the self-progenies of *dek40-ref* heterozygous ear (No.16) were selected for experiments because the *dek40* homozygous mutant was lethal. The genotypes of two mutation sites in GRMZM2G304965 (+1719) and GRMZM2G005207 (+262) were identified by PCR and DNA sequencing. The genotype GG in both sites was WT and GA was heterozygous site. After genotyping, these individuals were self-pollinated and the phenotypes of their progenies were further determined.

**Table S3 Genotypes of kernels in the crosses between *dek40-ref* and *dek40-1* heterozygote's ear were identified by PCR-sequencing.**

| Number    | Genotype at +1719 | Genotype at +2180 |
|-----------|-------------------|-------------------|
| Mutant-1  | G/A               | G/A               |
| Mutant-2  | G/A               | G/A               |
| Mutant-3  | G/A               | G/A               |
| Mutant-4  | G/A               | G/A               |
| Mutant-5  | G/A               | G/A               |
| Mutant-6  | G/A               | G/A               |
| Mutant-7  | G/A               | G/A               |
| Mutant-8  | G/A               | G/A               |
| Mutant-9  | G/A               | G/A               |
| Mutant-10 | G/A               | G/A               |
| Mutant-11 | G/A               | G/A               |
| Mutant-12 | G/A               | G/A               |
| Mutant-13 | G/A               | G/A               |
| WT-1      | G/A               | G/G               |
| WT-2      | G/G               | G/G               |
| WT-3      | G/A               | G/G               |
| WT-4      | G/G               | G/G               |
| WT-5      | G/G               | G/A               |
| WT-6      | G/G               | G/A               |
| WT-7      | G/G               | G/G               |
| WT-8      | G/A               | G/G               |
| WT-9      | G/G               | G/A               |
| WT-10     | G/A               | G/G               |
| WT-11     | G/A               | G/G               |
| WT-12     | G/A               | G/G               |
| WT-13     | G/G               | G/A               |

**Table S4 Primer sequences used in this study**

| Primer Name           | Sequence (5'-3')             |                                |
|-----------------------|------------------------------|--------------------------------|
| umc1380-F             | CTGCTGATGTCTGGAAGAACCCT      |                                |
| umc1380-R             | AGCATCATGCCAGCAGGTTTT        |                                |
| umc1152-F             | CCGAAGATAACCAAACAATAATAGTAGG |                                |
| umc1152-R             | ACTGTACGCCTCCCCTTCTC         |                                |
| M2-F                  | GGTTGGAGGGGCAAATCTTG         |                                |
| M2-R                  | ATATAGACAAATGGCGCGGC         |                                |
| M3-F                  | ACTGTCTGTCTGTGAGCCAT         |                                |
| M3-R                  | GGCCAGAGAGAGAGTGAGTG         |                                |
| M4-F                  | GTGAAGGACAGAAGGAAG           |                                |
| M4-R                  | CCGTATCTGTACGCTGGCTG         | Fine mapping                   |
| M5-F                  | GTTGCAGGAGATGGAGGACT         |                                |
| M5-R                  | AGACAAACTGCACGTCCATC         |                                |
| M6-F                  | AGAAGCAGCCCCAGAGTTTA         |                                |
| M6-R                  | CGGTTTGCTTTGGTGTCTTC         |                                |
| M7-F                  | GTCCCGCCTGATTAACTTGC         |                                |
| M7-R                  | CAGGAAACACGAAGACACCA         |                                |
| M8-F                  | CAGAAGGCCAGAACGAAGC          |                                |
| M8-R                  | GGCGTGCAAGTAACTGGAT          |                                |
| M9-F                  | TGATCGATGGCTCAATCAGT         |                                |
| M9-R                  | ATCTGGAACACCGTCGTCTC         |                                |
| dek40-ref-F           | GATAACAGAGGCTCAGAAAC         | Identify <i>dek40-ref</i>      |
| dek40-ref-R           | CGTCCCAGTATATCCACCA          | mutant                         |
| dek40-1-F             | CTGATGACAAGCCGCTACAAAC       | Identify <i>dek40-1</i> mutant |
| dek40-1-R             | CACCTCGATCCAGCTACAACC        |                                |
| WRKY-F                | CGTTCCTACCACCTCCTGC          | Identify WRKY gene mutant site |
| WRKY-R                | CTGCCCCGTA CTCTCCAC          |                                |
| DEK40-SC-1F           | AGATCTATGCCCTGCCGCCCCACGC    | Construct DKE40-GFP            |
| DEK40-SC-1R           | GGTACCACCACCAACGACTCTAACC    |                                |
| DEK40-SC-2F           | TCTAGAATGCCCTGCCGCCCCACGC    | Construct DKE40-RFP            |
| DEK40-SC-2R           | GGTACCACCACCAACGACTCTAACC    |                                |
| <i>Zmactin</i> -qRT-F | ATGGTCAAGGCCGTTTTCG          | qRT-PCR                        |
| <i>Zmactin</i> -qRT-R | TCAGGATGCCTCTCTTGCC          |                                |
| <i>ZmAox1</i> -qRT-F  | CCTATTGGACCGTCAAATTACTGC     |                                |
| <i>ZmAox1</i> -qRT-R  | CACTGTTTCCAGCATCATAGCAC      |                                |
| <i>ZmAox2</i> -qRT-F  | CCAAGACGCTGATGGATAAGGT       |                                |
| <i>ZmAox2</i> -qRT-R  | CCACGGTTTCCAGCATCAT          |                                |
| <i>ZmAox3</i> -qRT-F  | CGGCACCGAGAAGCATGA           |                                |
| <i>ZmAox3</i> -qRT-R  | CTGGTCCACTTCCACTCCGT         |                                |
| GRMZM2G456217-qRT-F   | ACGACGAGCTCTGAATTGC          |                                |

|                         |                             |         |
|-------------------------|-----------------------------|---------|
| GRMZM2G456<br>217-qRT-R | ATTCACAGTCGGCGATGTTC        |         |
| GRMZM2G022<br>799-qRT-F | GACCAGGGGTTCCAACAAC         | qRT-PCR |
| GRMZM2G022<br>799-qRT-R | CCTCTCCTTGCTCATTTGCT        |         |
| pGEX-4T-1-<br>DEK40-F   | TAAGATCTATGCCCTGCCGCCCCACGC | REMSA   |
| pGEX-4T-1-<br>DEK40-R   | GCCCCGGGACCACCAACGACTCTAACC | REMSA   |
